# Supplementary material for: Repeatedly Evolved Host-Specific Ectosymbioses between Sulfur-Oxidizing Bacteria and Amphipods Living in a Cave Ecosystem
Source: PubMed Central journal article supplement (PMC3510229; doi:10.1371/journal.pone.0050254), 2012-11-29

PCR primer combinations used for detection of *Thiothrix* clade T1:

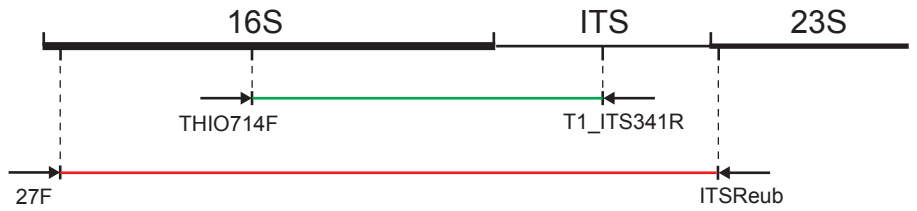

PCR primer combinations used for detection of *Thiothrix* clade T2:

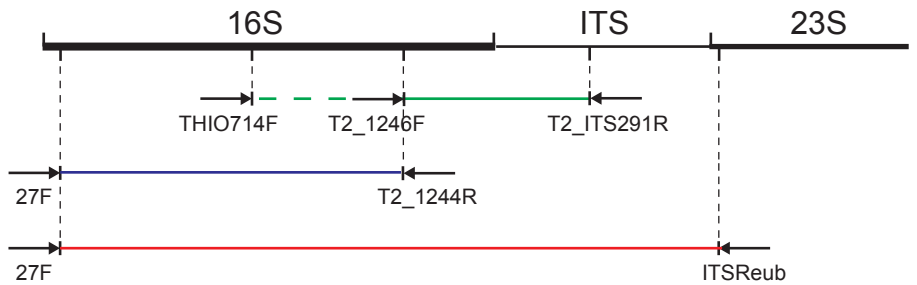

PCR primer combinations used for detection of *Thiothrix* clade T3:

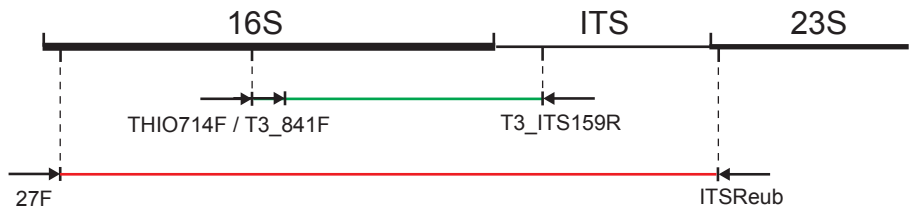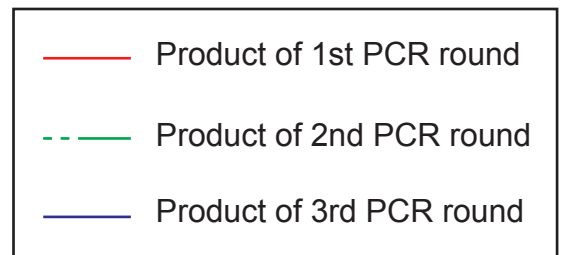

Supplement: pone.0050254.s001.pdf [file pone.0050254.s001.pdf]
