# Supplementary material for: Repeatedly Evolved Host-Specific Ectosymbioses between Sulfur-Oxidizing Bacteria and Amphipods Living in a Cave Ecosystem
Source: PubMed Central journal article supplement (PMC3510229; doi:10.1371/journal.pone.0050254), 2012-11-29
Supplement: pone.0050254.s004.pdf [file pone.0050254.s004.pdf]

## Bauermeister Supporting Information Table S2 (Part I)

| Host species         | Sampling location, year                                                                                            | Clone #<br>(GenBank accession No.) | Top blastn hit / source<br>(GenBank accession No.)                                                                  | Query coverage* | Maximum identity |
|----------------------|--------------------------------------------------------------------------------------------------------------------|------------------------------------|---------------------------------------------------------------------------------------------------------------------|-----------------|------------------|
| <i>N. ictus</i>      | Il Bugianardo (BG), 2008                                                                                           | 10 (JN983615)                      | Uncultured bacterium clone reservoir-27 / Dianchi Lake bacterioplankton community (JF697408.1)                      | 100%            | 93%              |
|                      |                                                                                                                    | 11 (JN983616)                      | <i>Propionibacterium acnes</i> (AB573714.1)                                                                         | 100%            | 99%              |
|                      |                                                                                                                    | 13 (JN983617)                      | <i>Candidatus Hepatoplasma crinochetorum</i> clone 59 / terrestrial isopod gut symbiont (AY500250.1)                | 100%            | 87%              |
|                      |                                                                                                                    | 14 (JN983618)                      | Uncultured <i>Staphylococcus</i> sp. clone EHFS1_S09d / European clean room environments (EU071495.1)               | 99%             | 99%              |
|                      |                                                                                                                    | 16 (JN983619)                      | Uncultured bacterium clone Dianchi-29 / Dianchi Lakeshore polluted water microbial community (HQ324875.1)           | 100%            | 96%              |
|                      |                                                                                                                    | 17 (JN983620)                      | <b>Uncultured Bacteroidetes bacterium clone UMAB-cl-134 / Antarctic Peninsula microbial community (FR749759.1)</b>  | <b>100%</b>     | <b>95%</b>       |
|                      |                                                                                                                    | 19 (JN983621)                      | Uncultured Pseudomonadales bacterium clone LCM020 / bacterial colonialization on adult black fly (JF733452.1)       | 100%            | 94%              |
|                      |                                                                                                                    | 20 (JN983622)                      | Uncultured bacterium clone reservoir-27 / Dianchi Lake bacterioplankton community (JF697408.1)                      | 100%            | 94%              |
|                      |                                                                                                                    | 21 (JN983623)                      | <i>Fangia hongkongensis</i> strain UST040201-002 / coastal seawater of Hongkong (NR_041041.1)                       | 99%             | 82%              |
|                      |                                                                                                                    | 23 (JN983624)                      | Uncultured bacterium clone lka65 / Frasassi microbial mat community (EF467563.1)                                    | 100%            | 99%              |
|                      |                                                                                                                    | 25 (JN983625)                      | Uncultured bacterium clone DLN-150 / fecal microbiota in gayal (FJ848446.1)                                         | 100%            | 97%              |
|                      |                                                                                                                    | 26 (JN983626)                      | Uncultured bacterium clone reservoir-27 / Dianchi Lake bacterioplankton community (JF697408.1)                      | 100%            | 94%              |
|                      |                                                                                                                    | 28 (JN983627)                      | <i>Candidatus Hepatoplasma crinochetorum</i> clone 59 / terrestrial isopod gut symbiont (AY500250.1)                | 99%             | 87%              |
|                      |                                                                                                                    | 29 (JN983628)                      | Uncultured bacterium clone zEL43 / Frasassi microbial mat community (DQ415836.1)                                    | 100%            | 95%              |
|                      |                                                                                                                    | 33 (JN983629)                      | Uncultured bacterium clone EDW07B005_144 / Edwards Aquifer microbial community (HM066626.1)                         | 100%            | 96%              |
| 34 (JN983630)        | Uncultured Pseudomonadales bacterium clone LCM020 / bacterial colonialization on adult black fly (JF733452.1)      | 100%                               | 95%                                                                                                                 |                 |                  |
| <i>N. frassianus</i> | Grotta Bella (GB), 2008                                                                                            | 16 (JN983631)                      | Uncultured epsilon proteobacterium clone 4-138 / Alum Rock Park springs microbial community (GQ354915.1)            | 100%            | 99%              |
|                      |                                                                                                                    | 20 (JN983632)                      | Uncultured bacterium clone VC105120 / Frasassi microbial mat community (JF747849.1)                                 | 100%            | 99%              |
|                      |                                                                                                                    | 21 (JN983633)                      | Uncultured bacterium clone FC1_16S_47 / sulfidic karst systems microbial community (EU662454.1)                     | 100%            | 99%              |
|                      |                                                                                                                    | 27 (JN983634)                      | <b>Uncultured Bacteroidetes bacterium clone UMAB-cl-134 / Antarctic Peninsula bacterial community (FR749759.1)</b>  | <b>100%</b>     | <b>95%</b>       |
|                      |                                                                                                                    | 11 (JN983635)                      | <b>Uncultured bacterium clone EV818SWSAP25 / Kalahari Shield subsurface water bacterial community (DQ337068.1)</b>  | <b>100%</b>     | <b>94%</b>       |
|                      |                                                                                                                    | 3 (JN983636)                       | Uncultured bacterium clone VC1058 / Frasassi microbial mat community (JF747820.1)                                   | 100%            | 99%              |
|                      |                                                                                                                    | 4 (JN983637)                       | Uncultured bacterium clone C3E / Chinese mitten crab ( <i>Eriocheir sinensis</i> ) intestinal bacteria (DQ856548.1) | 99%             | 93%              |
|                      |                                                                                                                    | 6 (JN983638)                       | <b>Uncultured bacterium clone EV818SWSAP25 / Kalahari Shield subsurface water bacterial community (DQ337068.1)</b>  | <b>100%</b>     | <b>94%</b>       |
| 8 (JN983639)         | <b>Uncultured Bacteroidetes bacterium clone UMAB-cl-134 / Antarctic Peninsula bacterial community (FR749759.1)</b> | <b>100%</b>                        | <b>95%</b>                                                                                                          |                 |                  |

\* Reference value for blastn hit ranking

Purple = Top nucleotide BLAST (blastn) hit matched by more than one sequence from the same clone library

Red = Top nucleotide BLAST (blastn) hit matched by several sequences from different clone libraries

## Bauermeister Supporting Information Table S2 (Part II)

| Host species                   | Sampling location, year                                                                               | Clone #<br>(GenBank accession No.)                                                                          | Top blastn hit / source<br>(GenBank accession No.)                                                          | Query coverage*                                                                                             | Maximum identity |     |
|--------------------------------|-------------------------------------------------------------------------------------------------------|-------------------------------------------------------------------------------------------------------------|-------------------------------------------------------------------------------------------------------------|-------------------------------------------------------------------------------------------------------------|------------------|-----|
| <i>N. ictus</i>                | Lago Claudia (LC), 2009                                                                               | 2 (JN983640)                                                                                                | Uncultured Bacteroidetes bacterium clone IC4044 / Arctic glacier ice bacterial community (HQ622740.1)       | 100%                                                                                                        | 96%              |     |
|                                |                                                                                                       | 5 (JN983641)                                                                                                | Unidentified proteobacterium clone BD1-5 / deep-sea sediment bacterial community (AB015518.1)               | 100%                                                                                                        | 90%              |     |
|                                |                                                                                                       | 6 (JN983642)                                                                                                | Uncultured bacterium clone 8S7 / marine biofilm microbial community (JF272066.1)                            | 100%                                                                                                        | 88%              |     |
|                                |                                                                                                       | 8 (JN983643)                                                                                                | Uncultured bacterium clone FL0428B_P27 / sulfate-reducing cave biofilm microbial community (FJ716413.1)     | 100%                                                                                                        | 95%              |     |
| <i>N. frassasianus</i>         | Pozzo dei Cristalli (PC), 2008                                                                        | 1 (JN983644)                                                                                                | Uncultured bacterium clone 2C228550 / aquatic bacterial community (EU800447.1)                              | 100%                                                                                                        | 98%              |     |
|                                |                                                                                                       | 3 (JN983645)                                                                                                | Uncultured bacterium clone FrsFi199 / green phototrophic biofilm microbial community, Frasassi (JF747962.1) | 100%                                                                                                        | 99%              |     |
|                                |                                                                                                       | 4 (JN983646)                                                                                                | Uncultured bacterium clone VC10574 / Frasassi microbial mat community (JF747856.1)                          | 100%                                                                                                        | 99%              |     |
|                                |                                                                                                       | 5 (JN983647)                                                                                                | Uncultured bacterium clone lka79 / Frasassi microbial mat community (EF467575.1)                            | 100%                                                                                                        | 99%              |     |
|                                |                                                                                                       | 6 (JN983648)                                                                                                | Uncultured bacterium clone 2C228550 / aquatic bacterial community (EU800447.1)                              | 100%                                                                                                        | 98%              |     |
|                                |                                                                                                       | 7 (JN983649)                                                                                                | Uncultured bacterium clone 655952 / contaminated sediment microbial community (DQ404824.1)                  | 100%                                                                                                        | 85%              |     |
|                                |                                                                                                       | 8 (JN983650)                                                                                                | Alpha proteobacterium A0904 16S / - (AF236001.1)                                                            | 100%                                                                                                        | 93%              |     |
|                                |                                                                                                       | 49 (JN983651)                                                                                               | Uncultured bacterium clone 3BR-12AA / circumneutral freshwater microbial community (EU937911.1)             | 100%                                                                                                        | 96%              |     |
|                                |                                                                                                       | 51 (JN983652)                                                                                               | Uncultured bacterium clone SILK48 / Frasassi microbial mat community (EF467488.1)                           | 100%                                                                                                        | 99%              |     |
|                                |                                                                                                       | 52 (JN983653)                                                                                               | Uncultured bacterium clone TP-SL-B-271 / Shule river permafrost bacterial community (HQ864209.1)            | 100%                                                                                                        | 96%              |     |
|                                |                                                                                                       | 53 (JN983654)                                                                                               | Uncultured bacterium clone BCWCWP1A42 / western Ghats (India) microbial community (FJ598380.1)              | 100%                                                                                                        | 96%              |     |
|                                |                                                                                                       | 56 (JN983655)                                                                                               | Uncultured bacterium clone WM4 / Frasassi mat microbial community (DQ133921.1)                              | 100%                                                                                                        | 99%              |     |
|                                |                                                                                                       | 58 (JN983656)                                                                                               | Uncultured bacterium clone A156 / wastewater treatment plant microbial community (FJ660593.1)               | 100%                                                                                                        | 97%              |     |
|                                |                                                                                                       | Ramo Sulfureo (RS), 2008                                                                                    | 19 (JN983663)                                                                                               | Uncultured bacterium clone EV818SWSAP25 / Kalahari Shield subsurface water bacterial community (DQ337068.1) | 100%             | 94% |
|                                |                                                                                                       |                                                                                                             | 25 (JN983664)                                                                                               | Uncultured rumen bacterium clone L102RT-2-D06 / bovine ruminal epithelial bacterial community (HQ400111.1)  | 100%             | 82% |
| 33 (JN983665)                  | Uncultured bacterium clone CV104 / Frasassi acidic cave wall biofilm microbial community (EF530681.1) |                                                                                                             | 100%                                                                                                        | 99%                                                                                                         |                  |     |
| Ramo Sulfureo (RS), 2009       | 11 (JN983657)                                                                                         | Uncultured bacterium clone FGL7S_B30 / Fayetteville Green Lake microbial community (FJ437988.1)             | 100%                                                                                                        | 98%                                                                                                         |                  |     |
|                                | 14 (JN983658)                                                                                         | Uncultured bacterium clone A156 / wastewater treatment plant microbial community (FJ660593.1)               | 100%                                                                                                        | 98%                                                                                                         |                  |     |
|                                | 16 (JN983659)                                                                                         | Uncultured bacterium clone A156 / wastewater treatment plant microbial community (FJ660593.1)               | 100%                                                                                                        | 97%                                                                                                         |                  |     |
|                                | 17 (JN983660)                                                                                         | Uncultured bacterium clone Dianchi-34 / Dianchi lakeshore polluted water microbial community (HQ324880.1)   | 100%                                                                                                        | 95%                                                                                                         |                  |     |
|                                | 26 (JN983661)                                                                                         | Uncultured epsilon proteobacterium clone / sulfur spring microbial community (AB425206.1)                   | 100%                                                                                                        | 99%                                                                                                         |                  |     |
|                                | 28 (JN983662)                                                                                         | Uncultured bacterium clone A156 / wastewater treatment plant microbial community (FJ660593.1)               | 100%                                                                                                        | 97%                                                                                                         |                  |     |
| Sorgente del Tunnel (ST), 2009 | 30 (JN983666)                                                                                         | Uncultured Bacteroidetes bacterium clone UMAB-cl-134 / Antarctic Peninsula bacterial community (FR749759.1) | 100%                                                                                                        | 95%                                                                                                         |                  |     |

\* Reference value for blastn hit ranking

Purple = Top nucleotide BLAST (blastn) hit matched by more than one sequence from the same clone library

Red = Top nucleotide BLAST (blastn) hit matched by several sequences from different clone libraries
